# Supplementary material for: Motivational Interviewing as Evidence-Based Practice? An Example from Sexual Risk Reduction Interventions Targeting Adolescents and Young Adults
Source: Springer Nature journal article supplement (doi:10.1007/s13178-019-00388-y), 2019-03-21
Supplement: MOESM1 [file 16567922]

| **Study** | **Study design** | **Aims and objectives** | **Outcome measures** | **Main results** | **Comments** |
| --- | --- | --- | --- | --- | --- |
| Shrier et al (2001) (US) | RCT  N = 123 (239)  Intervention: 7 min video tape about STDs, self-assessment exercise, condom use exercise, individualized discussion of relevant topics. Met with an educator at 1, 3 and 6 months + received condoms and information materials. Sessions at 1, 3, 6, 12 months.  Based on MI, Social Cognitive Theory, and the TTM. Standardized intervention manual.  Control: standard STD education + free condoms.  Follow up: questionnaire at 1, 3, 6, 12 months.  Context: Urban hospital-based adolescent clinic. Female health educators.  Training: By the principal investigator in the theoretical underpinnings of the intervention and MI techniques. | A safer sex intervention to reduce STI rates, aimed at young women admitted for treatment of cervicitis or pelvic inflammatory disease.  Population: 14-22-year-old, majority BME. | 1. Condom use - with last sexual encounter - with main partner + measure for consistency - with another partner + measure for consistency  2. Sexual risk knowledge 3. Condom attitudes 4. Condom use negotiation 5. STD | 33 % attended all four follow-up visits.  At 1 month, intervention participants had greater increases in STD risk knowledge (P=.02). No differences at 3 months. At 6 months, fewer intervention participants reported having sex with a non-main sexual partner in the previous 6 months (P=.01). Small effect on condom attitudes (8.3 % compared to 7.9 %). | The relatively high attrition rate and small sample size makes this study lower in quality. Small and not lasting effect sizes, when significant.  Abstinence was discussed as ‘the most effective safer sex behavior’, which indicates notable difference in approach compared to many other studies and says something about the time period as well. |
| Bandura et al (2002) (US) | Pilot (quantitative + qualitative)  N = 39 (40) of 202 clinic visitors.  Intervention: 30 min session with follow-up session option. Study duration: 29 months.  Personnel at the clinic developed the FRAMES-D+CARE intervention manual based on MI and narrative therapy. The Stages of Change model was also used.  Adolescents were tracked with respect to duration of contraceptive use, utilization of clinic services, and any subsequent pregnancy testing.  Context: A comprehensive adolescent health clinic within a community and migrant health center in semi-rural Colorado. Staffed by a female OB-GYN nurse practitioner and a female health educator. | Aims: To explore the feasibility of the 30 min intervention aiming to encourage contraceptive use among adolescents at high risk for early childbearing.  Population: 13-18-year-old heterosexual girls and young women who were regular visitors at the clinic, mainly white and Hispanic. | Outcome measures*: -Likelihood of being sexually active -Readiness to use any form of contraception -Consistency of condom use -Likelihood of current partner using condoms with every act of intercourse -Attitudes towards pregnancy and childbearing -Return visits to the clinic  *Outcome measures not described in detail. | Fifteen girls (38%) decided at some point after the enrolment visit to initiate a trial of a hormonal contraception.  Twenty-six (67%) returned to the clinic for at least one visit.  14 (36%) became pregnant.  Qualitative analysis: Reasons for contracepting: 1. Partner-Related Concerns 2. Reproductive Health Problems 3. Changes to Prepare for Motherhood 4. Influence of Other Adults | Very specific study with regards to context, population and intervention focus.  Comprehensive description of the theoretical underpinnings and relation to key MI concepts, and the intervention manual.  No detail on MI training and quality assessment.  Qualitative analysis provided additional understanding of the barriers to contraceptive use. Among 14 young women 27 reasons were given, showing how complex the issue of contraception is.  Year of the study suggests that approach to these issues may have changed since. |
| Ingersoll et al (2005) (US) | RCT  N = 228  Intervention: BALANCE (Birth Control and Alcohol Awareness: Negotiating Choices Effectively). A 60-75 min MI counseling session following a semi-structured manual. Included use of TLFB.  Control: information leaflet about women’s health.  Follow-up: 1 month  Context: Urban university campus. Intervention delivered by research assistants.  Quality assessment: All sessions were audiotaped and used in weekly individual and group supervision sessions conducted by the senior authors. | Aim: To reduce alcohol-exposed pregnancy (AEP) risk in college women + to evaluate the feasibility of the intervention.  Population: Aged 18-24, majority white, heterosexual. Shown risk behavior in alcohol consumption + sexual risk behavior. | Primary outcome: -AEP risk  Contraception: -Use of effective contraception  Drinking: -Drinks per week -Binges in the past month | 93 % follow-up rate.  At 1-month 15% of the control subjects and 25% of the intervention women reported no risk drinking. Significantly fewer control subjects (48%) used effective contraception as compared with intervention women (64%). Significantly more intervention women (74%) were no longer at risk for AEP as compared with control subjects (54%).  The effect size was moderate at 19%.  Most women retained a pattern of binge drinking. | The intervention’s specific aim and context might make it hard to generalize its findings. However, the culture of drinking in university environments, and the need to increase knowledge about condom use is probably rather universal.  Intervention was developed by the authors. |
| Kiene & Barta (2006)  (US) | RCT  N = 157  Intervention: A brief computer-delivered 15-40 min session, which was repeated after 2 weeks (10-20 min). Tailored feedback messages based on baseline data. Based on IMB and SOC.  Control: Same techniques but focused on nutritional health.  Follow-up: 1 month  Context: Semi-urban university campus. | Aim: To increase condom knowledge, motivation to use condoms and frequency of actual condom use.  Population: Female and male college students aged 18-19, majority heterosexual women. | Behaviors: -Frequency of condom use and keeping condoms easily available -Persuade partner to use condom  Condom knowledge  Motivations: - Motivation to practice condom use preparatory behaviors and intention to use condoms. - Condom use behavioral skills - Condom use stage of change | Relative to the control group, treatment group members showed a greater increase in condom use information, and frequency of actual condom use and keeping condoms handy.  Small effect sizes. | The application that delivered the intervention was developed by one of the authors. The study was based in the psychology department (both interventionists and participating students). High attrition rate (95 % at follow-up), which may be due to participation giving course credits.  Control condition not really comparable to intervention.  Short follow-up interval. |
| LaBrie et al (2008)  (US) | RCT  N = 41  Intervention: Decisional balance assessment + 5–10 min MI-styled conversation around the reasons for using a condom in every sexual event. Use of TLFB.  Control: Received only alcohol-targeted intervention.  Follow-up: Survey after 1 month + 30-day post-intervention behavioral log.  Context: Large, urban university campus. Intervention delivered by clinical psychology doctoral students with unspecified MI training. | Aim: Increased motivation and intention of condom use, and decreased alcohol use.  Population: Male college students, 20 average age, heterosexual, majority white. At risk for both unsafe sex and heavy drinking. | Motivation/intent: -to increase condom use -to decrease alcohol use  Behavior: -condom use (regular and new/casual partner) -alcohol use (drinks per month, per occasion, and drinking days) | Condom usage increased from 41% to 70%.  Effect sizes for changes in motivation to increase condom use were large and for actual behavior were medium to large  Unchanged drinking behavior. | The absence of decrease in drinking leads the authors to suggests that the decisional balance was the primary source of changes in safer sex. However, this cannot be confirmed due to the control group being given TB as well and that it was the targeted behavior that differed.  Fairly good description of the MI style counseling, but no mention of what MI training entailed or whether MI use was assessed. |
| Barnet et al (2009) (US) | RCT  N = 235  Intervention 1: 20-minute computer-assisted MI (CAMI), quarterly intervals until 2 years postpartum. Based on TTM.  Intervention 2: Intervention 1 + monthly home visits with parenting education and support.  Control: Usual clinic visit  Follow-up: interview at 24 months.  Context: 5 pre-natal health clinics in a large, urban city. Paraprofessional interventionists.  Training: Initial 2.5 days on the TTM, MI and the CAMI protocol. Selected sessions were recorded to evaluate counselor’s proficiency using the MI Process Code.  Quality assessment: Biweekly group meetings w supervisors for feedback and assessment. | Aim: To reduce rapid subsequent births to adolescent mothers.  Population: Pregnant low-income African-American young women aged 12–18. | Primary: Repeat birth within 24 months  Secondary: -Plans to use condom at next intercourse -Plans to use hormonal contraception after delivery - Decision-Making-Competency (DMCI) -Wants another child within 2 years | ‘Receipt of 2 or more CAMI sessions, either alone or within a multicomponent home-based intervention, reduced the risk of rapid subsequent birth to adolescent mothers. | The results show tendencies that it was those with health insurance, who had abortions and had expressed intent to use contraception that were most likely to reduce the risk of rapid subsequent birth.  Challenges to intervention delivery included homelessness, crowded households, lack of electricity and abusive partners. |
| Schmiege et al (2009) (US) | RCT  N = 484  Intervention 1: Manualized psychosocial group-based MI-session based on the Theory of Planned Behavior and MET (3h).  Intervention 2: Intervention 1 + alcohol risk reduction component (3–4h).  Control: Information only (2h)  Follow-up: survey at 3 months.  Context: 3 detention centers in a large urban city.  Training: Intervention leaders were trained in the provision of each intervention, including specific training in the provision of MI/MET.  Quality assessment: Drift was controlled by regular meetings with intervention leaders and by the fact that all interventions followed a scripted intervention manual to ensure consistency of presentation across groups. Control of unique components across interventions. | Aim: To reduce HIV/STD risk behavior.  Population: detained youth aged 14–17 with sexual risk behaviors. Majority were young men of various ethnicity/race. | Primary outcomes:  -Risky sexual behavior -Sexual behavior while drinking  Mediational constructs: -Condom use attitudes - Perceived condom use norms -Self-efficacy for condom use skills -Intentions to practice safer sexual behavior | Intervention 2 was more effective in reducing sexual risk behavior, but the effect sizes were small. | Very long sessions in a very specific context.  Good description of interventions and control, outcome measures, and MI training and assessment of interventionists. |
| Wenzel et al (2009)  (US) | Focus group (Pilot)  N = 31 (7 focus groups)  Intervention: ‘The Power of YOU’ program. 3 group sessions (1,5h) based on social learning theory and decision-making theory.  Follow up: Feedback sessions (20–30 min) following the intervention + individual survey.  Context: 5 homeless shelters in a large urban county. Interventionist had previous experience working with the population. | Aim: To develop an intervention for skills training and attention to risks around unsafe sex, alcohol and drug use, and sexual abuse.  Population: Heterosexual women aged 18–25 residing in homeless shelters. Majority were African-American. | Questionnaire: - Satisfaction of discussion and its length - Recalling of key topics discussed - Condom use - Alcohol and drug use - Experiences of abuse  Feedback session: Discussion about their experiences and opinions about the intervention. | The young women were positive towards the information they received, such as practical condom use. They learned new skills such as ways to plan ahead for high-risk situations. They appreciated the non-judgmental MI approach.  Scores ranged between 3,9–5 on a 1–5 scale. | A productive way to develop an intervention targeted at a specific population and context.  Well described theoretical underpinnings of the intervention. No description of MI training or quality assessment. |
| Naar-King, Outlaw et al (2009) (US) | RCT (Pilot)  N = 83  Intervention: Two MI sessions á 30–45 min, 6 months apart. Delivered by African American peer outreach workers.  Control: Same MI sessions but with regular Masters level health workers.  Follow up: Review of medical records at 6 and 12 months.  Context: HIV treatment program at a hospital youth center in a large city.  Training: Interventionists in both conditions together received two full days of basic MI training by a clinical psychologist (member of MINT), followed by role plays and protocol-specific practice for several weeks, and maintained by weekly MI coaching from the same trainer.  Quality assessment: All sessions were audiotaped. One tape every other month per counselor was randomly selected for coding using MITI. | Aim: Testing the efficacy of peer outreach workers to retain adolescents and young adults in HIV care.  Population: HIV positive youth of both genders, aged 16–29, mostly African-American. | Treatment fidelity (MITI scores): - Global empathy - Global spirit - Complex reflections - Open-ended questions - Reflections: Questions  Retention in care: -Intervention dose -Gaps in care | Both groups showed large improvements in number of treatment sessions, however there was a somewhat larger effect size for intervention group. No significant difference for staff measure.  The intervention focused on staff competence, and the authors argue that paraprofessional staff can be equally well trained to deliver MI as masters-level health care staff and may even have an advantage in connecting with hard-to-reach populations. | Peer outreach workers can be trained to deliver MI with high fidelity, in some instances even higher than other staff who are university educated. Their peer position may be more indicative of their success.  It might be individual and dependent on the relationship between client and worker what type of skills are needed and what the youth prefer.  Detailed description of MI training and quality assessment procedures. |
| Naar-King, Parsons et al (2009) (US) | RCT  N = 186  Intervention: Specialty care + ’Healthy Choices’; 4 individual MI-sessions á 45–60 min delivered over 10 weeks.  Control: Specialty care only.  Follow up: Plasma viral load measured at 6 and 9 months.  Context: 5 different HIV clinics for young people in large cities. Interventionists were doctoral students in psychology or trained clinicians.  Training: 2-day MI training by MINT members.  Quality assessment: They received weekly telephone supervision and case feedback from 1 of the supervising trainers. Interventionists submitted videotaped recordings of each session to the research team both for supervisor review and for coding with MINT. | Aim: Improving health outcomes for youth with HIV.  Population: African-American youth 16–24 years, with a combination of risk behaviors (nonadherence to HIV medications, substance abuse, and unprotected sex). | Primary outcome: Viral load | Decreased viral load in the intervention group at 6 months, but not retained at 9 months. | Authors hypothesize that booster sessions and/or more comprehensive skills-building may be needed to improve results, i.e. that a brief MI intervention may be only the start to more intensive treatment for this group.  Detailed description of MI training and quality assessment procedures. |
| Naar-King et al (2010) (US) | RCT  N = 186  Intervention: Specialty care + ’Healthy Choices’, 4 individual MI-sessions á 45–60 min delivered over 10 weeks.  Control: Specialty care only.  Control: 3 months  Follow up:  Context: 5 different HIV clinics for young people in large cities. Interventionists were doctoral students in psychology or trained clinicians.  Training: 2-day MI training by MINT members.  Quality assessment: They received weekly telephone supervision and case feedback from 1 of the supervising trainers. Interventionists submitted videotaped recordings of each session to the research team both for supervisor review and for coding with MINT. | Aim: To increase motivation, self-efficacy to change risk behaviors and decrease depression.  Population: African-American youth 16–24 years, with a combination of risk behaviors. | Behaviors: - Avoiding alcohol use and illicit drug use - Use of condom for intercourse - Disclosure to sexual partners - Taking HIV medications as prescribed - Attending HIV primary care appointments  Motivational readiness for medication adherence or substance use  Self-efficacy: Temptation to use drugs, have unprotected sex or miss medications in that situation | A significant but small effect size for depression (not outcome specifically related to intervention).  Just under half of the sample completed the whole intervention (4 sessions). | Standard care involved frequent visits to the clinic, which could have impeded the young people’s motivation to attend even more sessions.  Detailed description of MI training and quality assessment procedures. |
| Outlaw et al (2010) (US) | RCT  N = 188  Intervention: 30 min MI session in field outreach, including offer of testing and counseling immediately after the session. Test result and posttest counseling offered within 7 days.  Control: Regular field outreach session, including offer of testing and counseling.  Context: Community venues. Peer outreach workers (POW).  Training: Two POW were trained to deliver MI during field outreach, and 2 were trained to deliver field outreach. In addition, all were trained to deliver HIV counseling and testing. MI training was delivered by a MINT member and followed by role plays and protocol-specific practice for several weeks.  Quality assessment: MINT trainer gave weekly coaching. All training and sessions were audio recorded and coded by independent MITI coders. | Aim: To increase 1) knowledge about HIV testing and 2) return visit after testing. To test integration of MI in field outreach work.  Population: African-American MSM 16–24 years, without knowledge of their HIV status. | - Condom use (different intercourse types) - Substance use (different types)  - Return visit and testing after intervention - Return for test results | Significant intervention effects on both measures: 49% received HIV counseling and testing compared to 20%, and return for test results were 98% versus 72%. | The concept of having peer outreach workers with a similar demographic background and age to the target population, may have proved successful in promoting participants’ engagement in and acceptance of the intervention. |
| Chacko et al (2010) (US) | RCT  N = 376  Intervention: A motivational behavioral intervention (MBI) based on TTM + standard care. 2 sessions á 30–50 min, including a short booster session and testing.  Control: Standard care.  Follow-up: Assessment at 6 and 12 months.  Context: A community-based, urban clinic providing free reproductive health care to young women. Bachelors- or Masters-level health educators.  Training: Trained by the project coordinator.  Quality assessment: A TTM and MI expert listened to audiotapes of the sessions to assess fidelity of implementation and monitor the health educator’s MI adherence. | Aim: To promote chlamydia and gonorrhea screening.  Population: Women 16–21 with sexual risk behavior. Majority African-American. | Primary outcome: Number of clinic visits made for STI check-ups in response to high-risk sexual behavior.  Secondary outcome: - Frequency of consistent condom use - Number of episodes of GC or CT cervical infection - Movement in the Stages of Change (SOC) for of seeking STI screening - Decisional balance of seeking STI screening - Process of change and seeking STI screening | No effects in any of the outcome measures. | Authors suggest that the sample may have been ‘too’ well-connected to medical contexts already. |
| Ceperich & Ingersoll (2011) (US) | RCT  N = 207  Intervention: ‘BALANCE (Birth Control and Alcohol Awareness: Negotiating Choices Effectively)’. A 60–75 min MI session.  Control: Brochure on women's health.  Follow-up: 1, 4 months.  Context: Urban university. Counselors had master’s degrees in psychology or social work.  Training: Investigators trained the counselors in MI and the intervention manual.  Quality assessment: All counseling sessions were audio-taped and reviewed weekly in individual supervision and weekly group supervision sessions conducted by the investigators (members of MINT). Counselors and supervisors reviewed and practiced MI principles, techniques, and strategies at least twice a month during the group supervision time. | Aim: To reduce alcohol-exposed pregnancy (AEP) risk.  Population: Female college binge-drinkers 18–24 years. | Primary outcome: -AEP risk  Contraception: -Use of effective contraception  Drinking: -Drinks per week -Binges in the past month | Reduced risk of AEP at 4 months (79.8% compared to 65.1 %) (small to moderate effect size). ‘More women improved their contraception than eliminated risk drinking.’ | A possible reason for the women not reducing their alcohol consumption could be that they do not want to. The college environment may be a hard place to do so, while the risk of pregnancy may feel more acute. |
| Chen et al (2011) (US) | RCT  N = 142  Specialty care + ’Healthy Choices’, 4 individual MI-sessions á 45–60 min delivered over 10 weeks.  Control: Specialty care only.  Follow-up: Every 3 months for 15 months.  Context: 5 different HIV clinics for young people in large cities. | Aim: To increase condom use.  Population: African-American youth 16–24 years, living with HIV. | Primary: Sexual risk for HIV infection - prevalence rate of no condom use during sexual intercourse - the number of times of intercourse without a condom | Participants were categorized into three groups: (1) Persistent low sexual risk group (PLSR), (2) Delayed high sexual risk group (DHSR), (3) High and growing sexual risk group (HGSR). Intervention participants were more likely to be PLSR and maintained their status. No effects for HGSR. | High risk groups may need additional/more intensive intervention.  No description of MI training or quality assessment, but reference to previous studies by the authors (Naar-King, Parsons, et al. 2009, Naar-Kind et al. 2010). |
| Clinton-Sherrod et al (2011) (US) | RCT  N = 229  Intervention: 1) One session MI, 2) MI + feedback.  Control: 3) Feedback only, 4) baseline assessment only.  Follow-up: 3 months  Context: Mid-sized urban college. Master’s level students delivered the intervention.  Training: 40 hrs. of MI training (including lecture, role play, and practice) and submitted four practice tapes prior to seeing participants. | Aim: Reduce risky alcohol-use to prevent risk of sexual victimization.  Population: First-year college women 18–25, mostly white, with heavy episodic drinking. | Prior victimization (four behaviorally specific items that assessed coerced or forced sexual activity)  Number of drinks on drinking occasions during past month  Pressured or forced sex when intoxicated  Stages of Change Readiness and Treatment Eagerness Scale (SOCRATES 8A), Ambivalence and Recognition subscales. | The hypothesis of reductions in alcohol used being related to reductions in violence was not supported. Inconclusive interaction effects when treatments conditions are analyzed per prior victimization. | It is a problematic approach to design an intervention which aims to reduce women’s risk of being sexually assaulted by assigning them the responsibility to drink less, rather than target the perpetrators.  The inconclusive results concerning prior victimization may indicate that other types of interventions are needed for victims of sexual violence, than motivational.  No MI quality assessment. |
| Mason et al (2011) (US) | RCT (pilot)  N = 28  Intervention: 20 min MI session + social network counseling (MI∫SN) following standard care.  Follow-up: 1 month  Control: Standard care.  Context: Urban primary care clinic. Therapists (MET/CBT-5 and clinical mental health counseling).  Training: The primary trainer was a clinical psychologist and a MINT member. The therapist took an MI workshop with the trainer, and learned the treatment protocol through review of the treatment manual, clinical discussions, and serving as a “client” through mock sessions.  Quality assessment: MITI was used to code the sessions. | Aim: To reduce substance use and associated risk behaviors.  Population: Young women aged 14–18, majority African-American, a third living below the U.S. poverty line. | Primary outcomes: - Substance use - Trouble due to alcohol use - Substance use before sex - Social network quality - Offers to use marijuana - Social stress - Ready to start counseling  Scales: Substance use, Mental health, Social network, Sexual behavior, Readiness to change (Readiness Ruler) | Significant results: ‘Less trouble due to alcohol use, less substance use before sexual intercourse, less social stress, less offers for marijuana use, and increased readiness to start counseling’ (moderate to large effect sizes). | Difficult to draw conclusions from a small pilot study with one-month follow-up.  A feasibility study with patients and their parents guided the development of the intervention.  No detail of quality assessment procedures (e.g. how were coded sessions used). |
| Lisha et al (2012) (US) | RCT  N = 1426  Intervention: 1) ‘Project Towards No Drug Abuse’ (TND) only, 2) TND + MI (based on a ‘motivation, skills, and decision-making model’). 12 classroom sessions á 45 min during 4 weeks + one MI-session via telephone 1-month post-intervention (#2). Based on components of the motivation, skills, and decision-making (MSD) model.  Control: No treatment.  Follow-up: survey after intervention.  Context: 8 continuation high schools in California. Health educators.  Quality assessment: Self-assessment of the program delivery process. | Aim: Preventing drug abuse + associated sexual risk.  Population: Continuation high school youth, who, compared to general high school youth, are at a higher risk for drug abuse and risky sexual behavior. Aged 14–21 and of different ethnicities (majority Hispanic). | Risk Behaviors: - Substance use - Violence - Condom use  Program-specific knowledge: - Representing the 12 sessions  Motivation/Cognitive Misperception: - Drug use myths - Health as a value - Motivation to improve  Skills: - Social self-control - Assertiveness - Engagement coping  Decision-Making/Commitment: - Decision-making avoidance - Decision-making confidence - Drug use intentions - Sexual behavior intentions and perceived norms  Participants’ intervention responsiveness  Program providers’ fidelity | The program was strongly adhered to (86%) and average attendance was relatively high (77-80%). Classes were rated as somewhat difficult to teach, students were perceived to be moderately interested in the lessons, on average, between 51% and 75% participated in the discussions.  Knowledge scores were weak (almost 40%) and no difference between conditions.  Decrease in intercourse without condoms and in perceived peer norms for condom use.  12-month drug use intentions decreased, motivation to improve and drug use myths were positively changed, greater in TND only. | A program specifically developed for group delivery to youth in continuation high schools.  Many measures that assess other than the endpoint outcomes (decreased drug use and sexual risk-taking behavior).  No mention of how the health educators were trained in MI, and quality assessment was only self-assessed. |
| Sussman et al (2012) (US) | RCT  N = 1426  Intervention: 1) ‘Project Towards No Drug Abuse’ (TND) only, 2) TND + MI (based on a ‘motivation, skills, and decision-making model’). 12 classroom sessions á 45 min during 4 weeks + 3 20-min MI-session via telephone 1-month post-intervention (#2).  Control: No treatment.  Follow-up: survey directly after intervention.  Context: 8 continuation high schools in California. Health educators.  Training: TND+MI condition interventionists were trained in MI.  Quality assessment: MI telephone sessions were audio taped and MITI coded. | Aim: Preventing drug abuse + associated sexual risk.  Population: Students aged 14–21 of different ethnicities (majority Hispanic). | Primary: Substance use behavior  Risky sexual behavior: - Condom use - Sexual intercourse while using - Number of sexual partners  Perceived quality of the classroom program | No effects compared to previous TND + MI intervention. Authors speculate that it can be due to intervention becoming too extensive.  On average, the MI sessions met the MITI proficiency standard. |  |
| Yeagley et al (2012) (US) | Pilot  N = 18  Intervention: One MI-session á 30–40 min following usual clinic visit.  Follow-up: Survey directly after intervention.  Context: An urban outpatient university-based clinic.  Training: The MI sessions were conducted by one individual. No information was given on training or occupation of this person. | Aim: To increase positive attitudes towards this type of intervention, and towards medication adherence and HIV diagnosis disclosure.  Population: 13–24-year-old African-American HIV-infected youth. | Participants’ attitudes about:  - adherence to medications  - attitudes about disclosure of HIV diagnosis  - acceptability of the intervention.  The Client Evaluation of Motivational Interviewing Alternate (CEMIalt) was completed before and directly after the MI session. | 67% were more positive towards treatment, 61% liked the intervention better than usual care, 78% thought the intervention could be useful to them, 61% became more positive towards disclosing their HIV-status. | Lacking description of MI training and no information on quality assessment. |
| Bogart et al (2013) (South Africa) | RCT  N = 66 parents, 64 children  Intervention: 2 groups á ∼15 parents received ‘Let's Talk!’, a worksite-based parenting program. 5 weekly 2-hour group sessions for parents. Manual.  Control: 2 wait-list groups.  Follow-up: Survey at 1–2 weeks.  Context: Large public worksite in Cape Town, South Africa. Peer HIV educators.  Training: Two 5-day workshops led by a doctoral level clinical psychologist who modeled the program sessions and taught MI principles.  Quality assessment: One observer, as well as the facilitator and co-facilitator, rated the coverage of manual topics in each session. | Aim: To improve parent-child communication about HIV and sexual health and parent condom use self-efficacy and behavior.  Population: Parents and their 11–15-year-old children. | Communication about HIV and sex (per topics discussed).  Comfort talking about sex.  Parents’ self-efficacy for condom use.  Condom use behaviors. | Parents rated the program highly (91%).  Increased comfort with talking to their adolescent about sex, and the number of sex- and HIV-related topics discussed. Increased likelihood to discuss new sex- and HIV-related topics not discussed before the intervention.  Increased self-efficacy for condom use. | An interesting model with a community-based participatory approach where the City was an equal partner throughout the research process. The community-academic study team also partnered with a community advisory board.  The intervention was adapted to the specific cultural, linguistic and otherwise relevant contextual factors (compared to the original US program).  Lacking detail in MI training and quality assessment. |
| Naar-King et al (2013) (US) | RCT (pilot)  N = 76  Intervention: ‘Motivational Enhancement System for Adherence (MESA)’, two 30-min sessions computer-delivered MI.  Control: Same computer program but targeting nutrition and physical activity.  Follow-up: HIV-1 viral load at baseline, 3 and 6 months, and self-reported adherence at 3 and 6 months.  Context: 8 sites in the National Institutes of Health Adolescent Trials Network for HIV/AIDS. | Aim: To facilitate adherence to newly prescribed HIV treatment (ART).  Population: HIV positive youth aged 16–24. A majority were homo- and bisexual men of African-American and other racial minorities. | Primary: HIV viral load  Self-report of adherence  Adherence Recall  Satisfaction | An overall decreasing trend in viral load.  Intervention group reported greater adherence on two of three adherence measures (7-day and weekend adherence) at 6 months with medium to large effect sizes. | Small sample size as 8 sites were included.  No description of MI training or quality assessment. |
| Rongkavilit et al (2013) (Thailand) | RCT (pilot)  N = 74  Intervention: ’Healthy Choices’, 4 individual MI-sessions á 60 min delivered over 12 weeks. Based on IMB. Use of TLFB.  Control: 4 individualized sessions of general health education (no MI training for interventionist, who was a research assistant).  Follow up: 1 and 6 months  Context: Thai Red Cross AIDS Research Centre clinics in Bangkok. Psychologists.  Training: Trained by MINT members.  Quality assessment: All sessions were taped. One-third were randomly selected weekly for MITI evaluation. The counselor met weekly with the supervisor to review MITI feedback and discuss case issues.  Control sessions were taped and fidelity was reviewed by research staff. | Aim: To decrease sexual risks, alcohol use, and increase antiretroviral adherence.  Population: Youth (majority MSM) 16–26 with HIV. | Primary: Condom use  Secondary: - Sexual behaviors - Substance use - Antiretroviral adherence - Plasma HIV Viral Load - Mental Health - Health Concerns - Motivational Readiness - Self-Efficacy | The proportion of participants who had sex with either HIV-uninfected or unknown partners at 6 months was lower in the intervention group.  Counselor’s fidelity to MI was rated as ‘solid competence’ on global measures. This was the case on all MI adherent behaviors as well, except the ratio of reflections to questions, which scored in the range of ‘beginning proficiency’. | Detailed description of MI training and quality assessment procedures. |
| Rongkavilit et al (2015) (Thailand) | RCT  N = 110  Intervention: ’Healthy Choices’, 4 individual MI-sessions á 60 min delivered over 12 weeks. Based on IMB. Use of TLFB.  Control: 4 individualized sessions of general health education (no MI training for interventionist).  Follow up: 1 and 6 months  Context: Thai Red Cross AIDS Research Centre clinics in Bangkok. Psychologists.  Training: Trained by MINT members.  Quality assessment: All sessions were taped. One-third were randomly selected weekly for MITI evaluation. The counselor met weekly with the supervisor to review MITI feedback and discuss case issues.  Control sessions were taped and fidelity was reviewed by research staff. | Aim: To decrease sexual risks, alcohol use, and increase antiretroviral adherence.  Population: Youth (majority MSM) 16–26 with HIV. | Primary: Condom use  Secondary: - Sexual behaviors - Substance use - Antiretroviral adherence - Plasma HIV Viral Load - Mental Health - HIV stigma - HIV knowledge - Motivational Readiness - Self-Efficacy | Self-efficacy regarding HIV disclosure to partners was significantly higher in the intervention group than the control group at 6 months post-session. | Detailed description of MI training and quality assessment procedures. |
| Foster et al (2014) (UK) | Pilot  N = 11  Intervention: Financial incentives in the form of gift vouchers linked to HIV viral load results and attendance for MI  Follow up: Viral load checks at 12 and 24 months.  Context: Specialist young person’s HIV clinic. Clinical psychologist and nurse specialists.  Training: Trained in MI techniques. | Aim: To improve treatment adherence for young adults with PaHIV, longstanding poor adherence to ART and severe immunosuppression.  Population: 8 F and 3 M aged 16–23 years, 8 of black African origin and 3 Caucasian, born with HIV, currently off treatment despite multiple attempts to restart. | Primary: Viral load  Secondary: - New AIDS diagnosis - Hospital admission - Additional HIV associated resistance mutations | ‘This intervention impacted the VL and/or CD4 count of all participants even if adherence could not be sustained and amongst a significant proportion adherence patterns were sustained post completion of the scheme.’ | The ‘‘Incentive Scheme (IS)’’ was developed in conjunction with established multidisciplinary adherence support (clinical psychology, clinical nurse practitioners, specialist HIV pharmacist, and peer support).  Financial incentives seem somewhat unlikely to be implemented in these times of health care cuts. |
| Morrison-Beedy et al (2014) (US) | RCT  N = 738  Intervention: ‘The Health Improvement Project for Teens (HIPTeens )’, 4 weekly 2-hour small group sessions and 2 90-min booster sessions. Based on IMB. Detailed manual.  Control: A structurally equivalent health promotion.  Follow-up: 3, 6 and 12-months.  Context: Large, metropolitan area. Applied-health professionals experienced in group processes.  Training: MI training videotapes, role-plays, modeling, rehearsal, feedback, periodic reviews of manualized intervention procedures throughout the study.  Quality assessment: random observation of groups by the intervention leaders; random review and ratings of audiotapes from group sessions (all sessions were audio-taped); weekly meetings between facilitators and team leaders; monthly team meetings; self-evaluation forms after every session relating to the meetings’ session goals and amount of participation by each of the girls; group guidelines of confidentiality to prevent cross-contamination between the groups, and guidelines pertaining to appropriate responses if girls enrolled in the control intervention ask about HIV-related topics. | Aim: To reduce sexually-risky behaviors.  Population: Heterosexual, sexually active young women 15–19 years, predominantly African American and impoverished. | IMB skills measures (reported elsewhere) Sexual risk-reduction strategies HIV/STD testing Discussions with partners Condom use Abstinence Avoidance of other risk-related activities | ‘The average number of strategies increased significantly within the intervention group, particularly sexual abstinence and avoidance of sexual situations.’  High rate of return for post-intervention sessions and follow-up. | The intervention was developed for this specific group of young women by extensive formative work with the target group.  Vague description of MI training, but intervention manual/description seems to incorporate MI consistently. Comprehensive quality assessment - although not said to be using MI coding systems. |
| Parsons et al (2014) (US) | RCT  N = 143  Intervention: ‘Young Men’s Health Project’, 4 1h-sessions of MI. Assessed through TLFB calendar. Detailed intervention manual developed for the project.  Control: 4 sessions of content-matched education about club drug use and HIV sexual risk reduction. Delivered by research assistants.  Follow-up: 3, 6, 9 and 12-months.  Context: Research center in NYC. Research staff (assessment) and master’s- and PhD-level therapists (intervention).  Different Staff members were used for TLFB assessment and delivery of MI or education sessions. In both conditions as well as in assessment rigorous training and fidelity control was conducted.  Training: Therapists participated in a 3-day MI training by the principal investigator (MINT member). Weekly individual and group supervision.  Quality assessment: All MI sessions were video recorded (of the therapist). Therapists met biweekly in supervision to view videotapes and discuss implementation issues. 80% of sessions were reviewed by a licensed clinical psychologist with expertise in MI. Fidelity was addressed throughout the trial through the use of MITI. | Aim: To reduce HIV risk and drug use.  Population: Gay and bisexual HIV-negative men who were 18–29 years, 60 % non-white. They had reported unprotected anal intercourse and recreational drug use and were non-treatment-seeking. | Primary: UAI with a casual partner - overall - under the influence of drugs/alcohol - number of days of drug use | Although both conditions reduced their rates or sexual risk behavior and drug use, intervention participants were 18% less likely to use drugs and 24% less likely to engage in unprotected anal intercourse than control participants. | Specific focus on non-treatment-seeking young men with high-risk behavior.  Comprehensive MI training and quality assessment. |
| Thurston et al (2014) (US) | Case study  N = 2  Intervention: Five 1-hour individual sessions + technological aspects (e.g. Medication Event Monitoring System (MEMS), text message reminders), positive strategies to enhance problem solving (Positive STEPS), which was guided by the evidence-based adult HIV medication adherence intervention ‘Life-Steps’ (based on CBT and MI). Manual-based.  Follow-up: 2 weeks (survey).  Context: A local children’s hospital and community health center. Master’s level counselor. | Aim: To illustrate feasibility, acceptability, and utility in an intervention that addresses patient-centered barriers to HIV medication adherence.  Population: 13–24 years old, HIV positive, and missed at least one dose within the last month. | Primary:  Adherence: - MEMS - Self-report  Secondary:  Medication Readiness  Depressive symptoms  Anxiety | Sandra: a perinatally infected woman, age 18, African American. Struggling with depression. Sandra had improvement in depressive and anxious symptoms, ‘likely related to her seeing a therapist at the end of the intervention’.  Bill: a behaviorally infected gay man, age 22, White. Primary area of difficulty was on-time adherence. Bill’s on-time adherence showed marked improvement and were maintained through follow-up. | Short follow-up period.  The Positive STEPS manual was based on qualitative interviews with adolescents and young adults aged 13–24 to explore barriers to HIV medication adherence, with emphasis on LGB youth.  Special focus on addressing adherence challenges differently based on gender, sexual orientation, or mode of infection.  Well-described treatment protocol, but no detail on MI quality assessment and how counselors were trained. |
| Lelutiu-Weinberger et al (2015) (US) | Pilot  N = 41  Intervention: ‘MiCHAT’, 8 MI sessions via Facebook chat. Based on IMB and CBST. Assessment by TLFB calendar. Manual-based. Different staff members conducted the TLFB assessment and delivery of MI sessions.  Follow-up: 3 months (survey) + evaluation interview (phone).  Context: Internet. Master’s- and PhD-level therapists delivered the intervention and possessed prior experience delivering MI and CBST intervention techniques in research and clinical settings.  Training: A licensed clinical psychologist conducted the initial training, which occurred through a two-day didactic seminar and completion of a mock course of treatment.  Quality assessment: The trainer led weekly individual and group supervision, and provided feedback on 95 % of sessions. | Aim: To test feasibility and acceptability of an intervention aiming to reduce HIV risk.  Population: Non-treatment-seeking MSM who engaged in condomless anal sex and substance use. Aged 18–29, varied ethnicities (46% non-White) and socioeconomic status. | Primary: Condomless anal sex with a casual partner - overall  - under the influence of drugs/ alcohol - number of days of drug use  Secondary: - Mental health - Gay-related stigma  Components of the IMB model - The effects of drug use - Sexual health knowledge - Motivation to change drug use and condomless anal sex behaviors - Behavioral self-efficacy skills - The Gay-Related Stigma Scale | 61 % completed the minimum dose of at least 5 sessions.  Reduced sexual risk behavior. Increases in knowledge of sexual risk and of the deleterious effects of substance use.  83 % of session participants evaluated the project positively, including its scope, structure, and impact. | Treatment manual developed from focus groups and interviews with participants of equivalent in-office intervention.  Relatively high drop-out rate.  Vague description of MI training and quality assessment. |
| Sanci et al (2015) (Australia) | RCT  N = 40 units with 132 clinics and 901 patients in total.  Intervention: 9h training in health-risk screening and MI for primary clinicians. Training in engaging youth and reporting risk data for all practice staff.  Control: Clinicians received one didactic educational seminar (three hours) on engaging youth and health risk screening.  Follow-up: 3 and 12 months (telephone).  Context: General practices in metropolitan and rural Victoria, Australia. | Aim: Training clinicians in health risk screening and MI, to motivate change in adolescent risk-taking behaviors.  Population: 14–24-year-old patients. | Primary outcomes:  1. patient report of clinician detection of at least one of six health risk behaviors 2. change in one or more of the six health risk behaviors  Secondary outcomes: 1. likelihood of future visits 2. trust in the clinician after exit interview 3. clinician detection of emotional distress and fear abuse in relationships 4. emotional distress | Intervention clinicians discussed more health risks per patient (59.7%) than comparison clinicians (52.7%) – but not sexual health risks. 40% of consultations did not include discussions of any health risks. Most clinics had previous interest and training in youth health, decreasing generalizability.  At 12 months, only unplanned pregnancy risk was significantly decreased. | Fairly small effects.  Comprehensive study with stratified cluster design. This type of study, compared to evaluations where only clinician-to-patient relationship is looked at, is likely more effective in impacting surrounding organizational and attitudinal aspects for intervention delivery.  No detail on MI training or MI fidelity measures. It can therefore not be confirmed whether MI was the effective component or not. |
| Whitaker et al (2015) (US) | Pilot  N = 20  Intervention: One 30-min MI-session postabortal contraception counseling, integrated into the clinical setting. Manual.  Follow-up: Directly after intervention + at 1 month (telephone + contraception counseling).  Context: Urban academic abortion clinic. Health care professionals.  Training: Initial MI training comprising two 3-h sessions of instruction, live demonstrations and role-play with feedback to practice MI skill. The training then included 5 h of encounter and feedback sessions and were evaluated for proficiency.  Quality assessment: MITI was used to evaluate some videotaped sessions (although not the full coding system). An experienced MI trainer reviewed the videos with counselors to further develop their skills. | Aim: To test feasibility of an intervention aiming to improve post abortion contraceptive uptake.  Population: Low-income young women 16–24 years, various ethnic backgrounds (majority Black). | Feasibility: - ability to approach patients and recruit participants - ability to complete the full intervention without interruption - participant self-reported satisfaction with and utility of the counseling intervention.  Contraception: - intended contraceptive method at the abortion visit. | Interrater percent agreement between reviewers of the videotaped counselor training sessions was 68%. All three counselors who were graded passed the competency assessment.  All 20 participants completed the full intervention and found the intervention helpful. 19 participants felt helped to select a contraceptive method. 13 women remained at 1-month follow-up. 12 (92%) found the intervention helpful, and 10 (77%) felt helped to select a method. | Intervention adapted to the specific clinical setting and to the population’s needs (e.g. ‘issues of limited education and health literacy’).  Analysis of Intended contraception use rather than actual use. |
| Gold et al (2016) (US) | RCT  N = 572  Intervention: Computer-assisted, counselor-guided MI (CAMI). 3 sessions á 30–45 min at 0, 3 and 6 months following regular clinic visit. Based on TTM. Use of TLFB.  Control: Didactic educational counseling based on standard family planning curricula, without personalized feedback. Identical assessment and intervention schedules. Delivered by ‘a layperson with a bachelor’s degree level of training’.  Follow-up: A TLFB and computerized assessment at 3 and 6 months, immediately before the intervention session, and at 3 months post-intervention.  Context: Children’s Hospital of Pittsburgh. Research assistants. | Aim: To reduce unprotected sex.  Population: Young women 13–21 years; 59% African American, who were at risk for pregnancy and STI. | Primary outcome:  Acceptability of the intervention  Secondary outcome: Reduction of pregnancy and STD risk | No significant differences in acceptability of the intervention, but intervention participants found the 60–90 min assessment to be too long.  High attrition rates, especially in intervention (55.2% completed). Participants who were Caucasian and older were significantly more likely to drop out by the 9-month follow-up.  The only significant effect was at 9 months, when the expected odds of engaging in unprotected sex was only approximately 34% as large as for those randomized to DEC. | No detail on MI training or quality assessment. |
| Miller et al (2016) (US) | Pilot  N = 20  Intervention: A 11–20 min MI-session following regular clinic visit (provision of personalized health services including condoms, prescription for emergency contraception, urine testing for STIs, and referral to the hospital-affiliated adolescent clinic). Based on the theory of planned behavior. Developed an intervention manual with MI guidelines.  Follow-up: 3-month (telephone interview).  Context: A Midwestern pediatric emergency department (ED). Graduate student in clinical health psychology with training in health behavior change counseling techniques including MI.  Training: 50 hrs. additional MI training with role playing, observation, and supervision by study authors who were MINT members. | Aim: To test the feasibility of the intervention and improve sexual health service use.  Population: Sexually active patients aged 14 to 19 years. predominantly African American with low socioeconomic status. | Primary outcome: Feasibility (determined by subjects): - MI fidelity - Efficiency - Satisfaction  Secondary: - Return visits for STI testing, to obtain/discuss contraception, and vaccination. - Completed health service(s) - Condom use | ‘Most (78%) reported that the interventionist maintained high fidelity to MI principles and most (80%) were very satisfied with the intervention.’  13 participants completed one or more ED-based services. Among those tested for STIs, one was infected.  15 (75%) were reached for follow-up, among which 6 reported sexual intercourse, and 4 of these condom use (75%). | Only 6 subjects reported no condom use at last sexual activity, which could indicate a sample that is not the most sexually risk taking. In fact, at baseline, youth did not attend ED for SRHR-related purposes.  Questionable whether the ED is the most appropriate place for an MI intervention, especially if youth do not seek such services in the first place. |
| Dale et al (2016) (UK) | Evaluation  N = 93 (among which 59 focused on SRHR)  Intervention: 6 sessions á 30–60 min. Primarily individual sessions, possibility for drop-in, occasionally group sessions. Based on the Theory of Planned Behavior, Social Cognitive Theory, and the Health Action Process Approach. The interventions were tailored accordingly and ranged from low to high intensity, of which the latter could comprise an MI component.  Follow up: Pre-post intervention evaluation + questionnaire at 6 months.  Context: A broader service in the local council for looked after young people and professionals involved with them. Health psychologists.  Quality assessment: Regular clinical supervision from a senior health psychologist and through the recording of techniques, which allowed reflection of the techniques most commonly used. A 40-item taxonomy of recorded behavior change techniques used in each session was documented. | Aim: To design and evaluate a health behavior change intervention targeting sexual health, smoking, exercise, healthy eating and non-dependent alcohol and drug use.  Population: Looked after young people aged 11–21, or those transitioning from care. | SRHR-related outcomes:  Behavior: - Contraception use - Frequency of condom use - Undertaken STI test  Intention: - Intention to improve sexual health  Well-being: Warwick-Edinburgh Mental Well-Being Scale (WEMWBS) | 52 were available for immediate post-intervention evaluation, 6 at 6-month follow-up.  ‘Sexual health and relationships were the most common lifestyle areas that young people chose to discuss.’  Intention to use condoms increased, as did pregnancy contraceptive use. General well-being scores increased.  MI techniques were not among the most frequently used. | Outcome measures were not controlled for MI use, making it difficult to know whether results were due to MI.  The intervention was part of a broader service, which included raising awareness with other services, and offering consultancy and training more widely to workers and carers. |
